# Supplementary material for: Development of a method for phycocyanin recovery from filamentous cyanobacteria and evaluation of its stability and antioxidant capacity
Source: PubMed Central journal article supplement (PMC8210370; doi:10.1186/s12896-021-00692-9), 2021-06-16
Supplement: 12896_2021_692_MOESM2_ESM.pdf [file 12896_2021_692_MOESM2_ESM.pdf]

## **Additional file 2: Additional table**

### ***BMC Biotechnology***

#### **Development of a method for phycocyanin recovery from filamentous cyanobacteria and evaluation of its stability and antioxidant capacity**

Jinichi Aoki<sup>1,2</sup>, Daisaku Sasaki<sup>3</sup>, Munehiko Asayama<sup>1,2\*</sup>

\*Correspondence: [munehiko.asayama.777@vc.ibaraki.ac.jp](mailto:munehiko.asayama.777@vc.ibaraki.ac.jp)

<sup>1</sup>College of Agriculture, Ibaraki University, 3-21-1 Ami, Ibaraki 300-0393, Japan

<sup>2</sup>United Graduate School of Agricultural Science, Tokyo University of Agriculture and Technology, 3-5-8 Saiwai-cho Fuchu-shi, Tokyo 183-8509, Japan

<sup>3</sup>BioX Chemical Industries Co. Ltd., 2-20-11 Inokuchidai, Nishi-ku, Hiroshima 733-0844, Japan

**Table S1** Extraction, yield, and purity of phycocyanin from cyanobacteria

| Cyanobacteria                         | Medium        | Extraction                           |                                               | Cells (W/D) | PC ( $\mu\text{g mL}^{-1}$ ) | Yield (%) | Purity (A620/A280) | References           |
|---------------------------------------|---------------|--------------------------------------|-----------------------------------------------|-------------|------------------------------|-----------|--------------------|----------------------|
|                                       |               | Method                               | Solvent                                       |             |                              |           |                    |                      |
| <i>Pseudanabaena</i> sp. ABRG5-3      | BG11          | Water addition                       | Water                                         | Wet         | 119                          | 30.4      | 3.10               | This study           |
| <i>Limnothrix</i> sp. SK1-2-1         | BG11          | Water addition                       | Water                                         | Wet         | 133                          | 28.9      | 2.14               | This study           |
| <i>Spirulina platensis</i> (NIES-39)  | BG11          | Water addition                       | Water                                         | Wet         | 39                           | 7.8       | 1.76               | This study           |
| <i>Spirulina platensis</i> (NIES-39)  | SOT           | Water addition                       | Water                                         | Wet         | 164                          | 21.1      | 1.76               | This study           |
| <i>Spirulina platensis</i> (CCC540)   | Z-medium      | Freezing and thawing                 | Acetate buffer, sodium chloride, sodium azide | Wet         | 77                           | -         | 0.75               | Kumar et al., 2014   |
| <i>Spirulina platensis</i> (CCC540)   | Z-medium      | Ammonium sulphate precipitation      | Acetate buffer, sodium chloride, sodium azide | Wet         | 124                          | -         | 1.50               | Kumar et al., 2014   |
| <i>Spirulina platensis</i> (CCC540)   | Z-medium      | Dialysis                             | Acetate buffer, sodium chloride, sodium azide | Wet         | 601                          | -         | 2.93               | Kumar et al., 2014   |
| <i>Spirulina platensis</i> (CCC540)   | Z-medium      | DEAE column chromatography           | Acetate buffer, sodium chloride, sodium azide | Wet         | 413                          | -         | 4.58               | Kumar et al., 2014   |
| <i>Spirulina platensis</i>            | -             | Conventional separation              | Phosphate buffer                              | Dry         | -                            | 7.2       | 0.88               | Seo et al., 2013     |
| <i>Spirulina platensis</i>            | -             | Hexane extraction with high pressure | Phosphate buffer, hexane                      | Dry         | -                            | 10.2      | 0.91               | Seo et al., 2013     |
| <i>Spirulina platensis</i>            | -             | Hexane extraction                    | Phosphate buffer, hexane                      | Dry         | -                            | 8.4       | 0.88               | Seo et al., 2013     |
| <i>Cylindrospermopsis raciborskii</i> | Modified-BG11 | Freezing and thawing                 | Phosphate buffer                              | Wet         | 2                            | -         | -                  | Horváth et al., 2013 |
| <i>Cylindrospermopsis raciborskii</i> | Modified-BG11 | Grinding                             | Phosphate buffer                              | Wet         | 3                            | -         | -                  | Horváth et al., 2013 |
| <i>Cylindrospermopsis raciborskii</i> | Modified-BG11 | Sonication                           | Phosphate buffer                              | Wet         | 3                            | -         | -                  | Horváth et al., 2013 |
| <i>Cylindrospermopsis raciborskii</i> | Modified-BG11 | Homogenization with polytron         | Phosphate buffer                              | Wet         | 1                            | -         | -                  | Horváth et al., 2013 |
